# Supplementary material
Source: HighWire-hosted journal article supplement (http://www.qdcxjkg.com/highwire/filestream/113983/field_highwire_adjunct_files/0/ERJ-01124-2012_Disclosures.pdf)
Supplement: ERJ-01124-2012_Disclosures.pdf [file ERJ-01124-2012_Disclosures.pdf]

**P.S. Hiemstra** has received a research grant from Boehringer Ingelheim.

**H. Meurs** has received unrestricted educational grants from Boehringer Ingelheim and MSD; the author's travel to ATS meetings was supported by Boehringer Ingelheim, AstraZeneca and Novartis.

**H.A.M. Kerstjens** has received funding for studies, acting as a principal investigator, and giving lectures from Boehringer Ingelheim/Pfizer, the producers of tiotropium and ipratropium. The author has also served as a consultant to Almirall, the manufacturers of aclidinium, and to Novartis, the manufacturer of glycopyrronium bromide.

**R. Gosens** has received a research grant from Boehringer Ingelheim.
